# Supplementary material
Source: PubMed Central journal article supplement (PMC3558817)

**Title**

Immunodetection of Serum Albumin Adducts as Biomarkers for Organophosphorus Exposure

**Authors**

Sigeng Chen, Jun Zhang, Lucille Lumley, and John R. Cashman

**Journal**

JPET

**Figure legend**

**Figure S1.** Western blot of plasma samples from African green monkeys and guinea pigs treated with soman or VX, respectively, for 72 hrs by mAb-HSA-GD and mAb-HSA-VX, respectively. **A.** Comparison of plasma from vehicle-treated monkeys (Lane 1) and plasma from soman-treated monkeys. (15.0 ug/kg, 48 hrs after administration). **B. Top Panel.** Comparison of nine plasma samples (1  $\mu$ l) from VX--treated guinea pigs (VX administered s.c. at 0.8-1.2 x LD<sub>50</sub> for 72 hrs (Lanes 1-9). **Lower Panel.** Ponceau staining of an identical gel as the blot for the **Top Panel** to show equal protein loading of serum albumin.

# Supplemental Figure 1

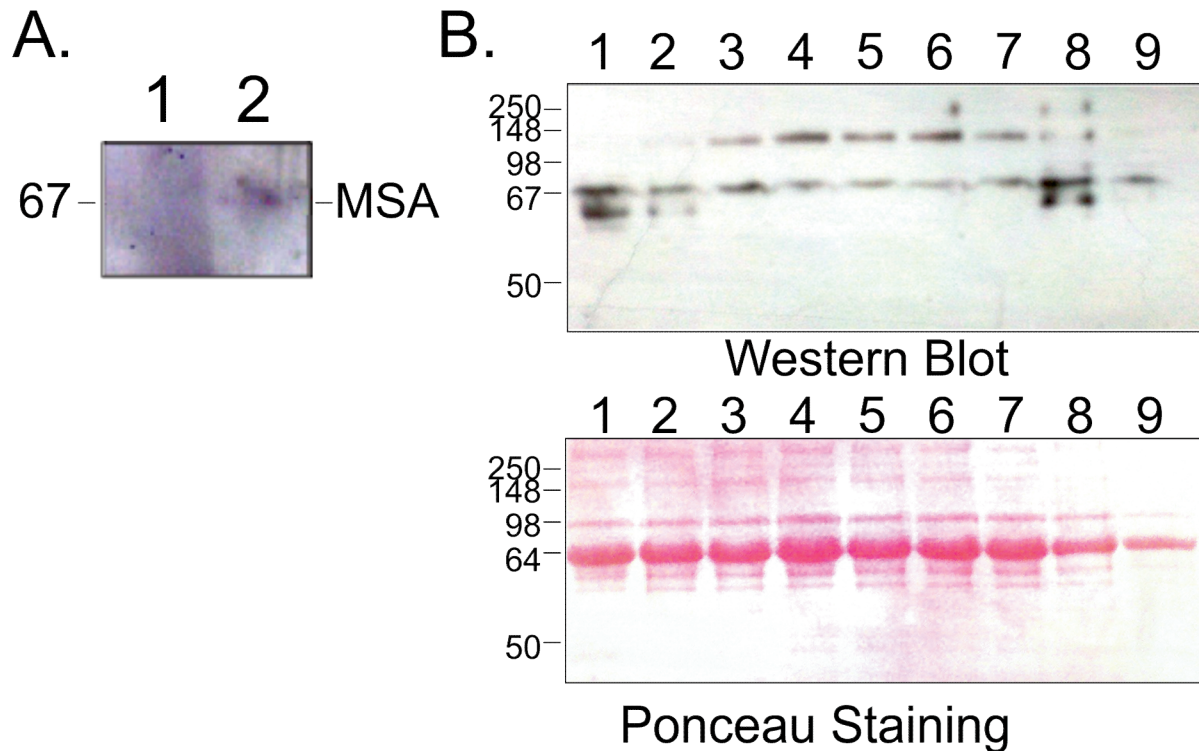

Supplement: supp_112.201368_JPET201368supplemental_figure_1.pdf [file supp_112.201368_JPET201368supplemental_figure_1.pdf]
